# Supplementary material for: Keggin-type polyoxometalate/thiospinel octahedron heterostructures for photoelectronic devices
Source: Royal Society of Chemistry journal article supplement (doi:10.1039/d0qi00371a), 2020-01-01
Supplement: d0qi00371a1.pdf [file d0qi00371a1.pdf]

Electronic Supplementary Information

**Keggin-type polyoxometalate/thiospinel octahedron heterostructures  
for photoelectronic devices**

Peng He<sup>†,‡</sup>, Xiaohong Li<sup>†</sup>, Ting Wang<sup>†</sup>, Weichao Chen<sup>\*,†</sup>, Hong Zhang<sup>\*,†</sup> and Weilin  
Chen<sup>\*,†</sup>

<sup>†</sup>Key Laboratory of Polyoxometalate Science of Ministry of Education, Faculty of  
Chemistry, Northeast Normal University, Changchun, 130024, P. R. China.

<sup>‡</sup>Hunan Provincial Key Laboratory of Chemical Power Sources, College of Chemistry  
and Chemical Engineering, Central South University, Changsha, 410083, P. R. China.

Email: chenwc061@nenu.edu.cn; zhangh@nenu.edu.cn; chenwl@nenu.edu.cn

## Table of Contents

|                                                                                                                                                                |    |
|----------------------------------------------------------------------------------------------------------------------------------------------------------------|----|
| Figure S1. EDX spectra of CoW <sub>12</sub> /CoIn <sub>2</sub> S <sub>4</sub> .....                                                                            | S3 |
| Figure S2. EDX elemental mapping of CoW <sub>12</sub> /CoIn <sub>2</sub> S <sub>4</sub> : (a) all elements, (b) O, (c) S, (d) In, (e) Co, and (f) W.....       | S3 |
| Figure S3. Nitrogen adsorption-desorption isotherms at 77 K for CoIn <sub>2</sub> S <sub>4</sub> and CoW <sub>12</sub> /CoIn <sub>2</sub> S <sub>4</sub> ..... | S4 |
| Figure S4. Full XPS spectra of (a) CoIn <sub>2</sub> S <sub>4</sub> ; High-resolution XPS spectra of (b) Co 2p, (c) In 3d, and (d) S 2p.....                   | S4 |
| Figure S5. Long-term stability of DSSCs based on CoW <sub>12</sub> -0.3/CoIn <sub>2</sub> S <sub>4</sub> heterostructures.....                                 | S5 |
| Table S1. The composition of elements for CoW <sub>12</sub> /CoIn <sub>2</sub> S <sub>4</sub> heterostructures obtained from EDS spectra.....                  | S6 |
| Table S2. EIS parameters using the different materials as CE.....                                                                                              | S6 |

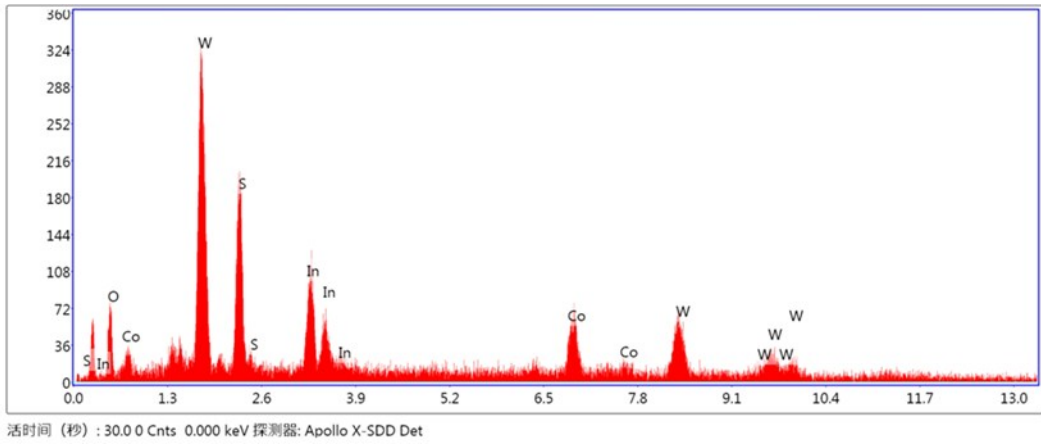

**Figure S1.** EDX spectra of  $\text{CoW}_{12}/\text{Coln}_2\text{S}_4$ .

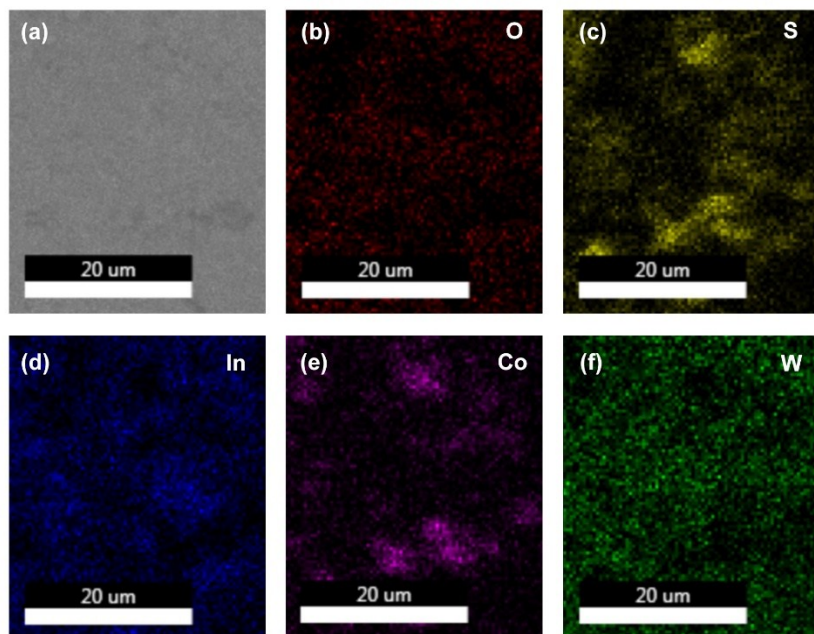

**Figure S2.** EDX elemental mapping of  $\text{CoW}_{12}/\text{Coln}_2\text{S}_4$ : (a) corresponding SEM images, (b) O, (c) S, (d) In, (e) Co, and (f) W.

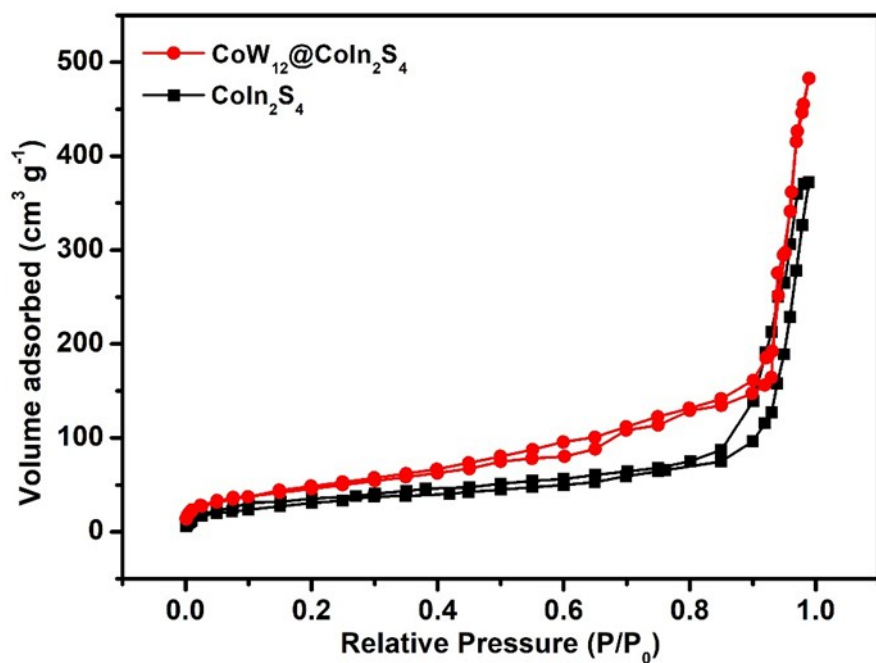

**Figure S3.** Nitrogen adsorption-desorption isotherms at 77 K for  $\text{CoIn}_2\text{S}_4$  and  $\text{CoW}_{12}/\text{CoIn}_2\text{S}_4$ .

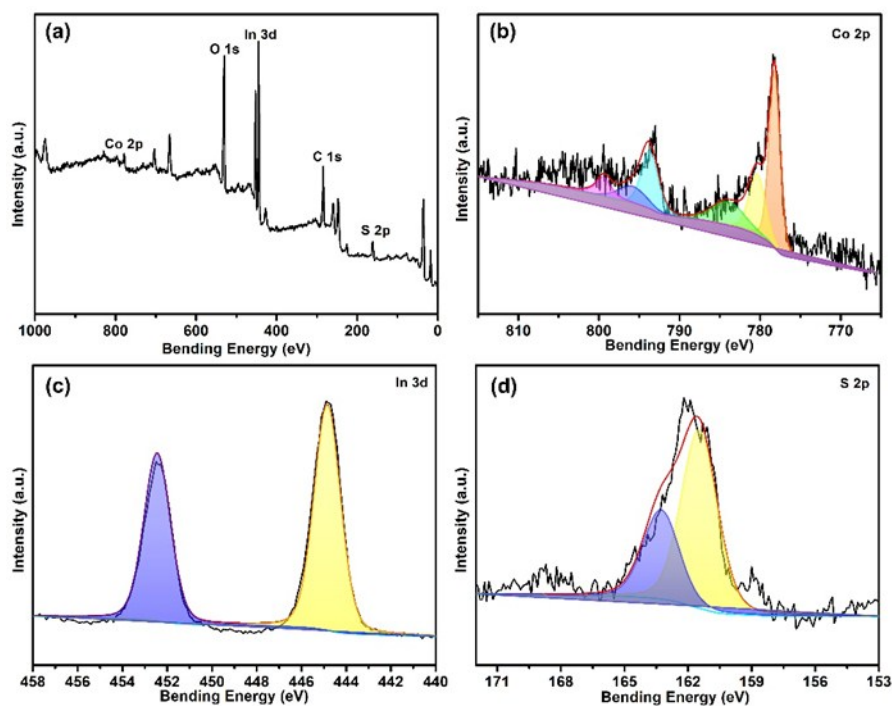

**Figure S4.** Full XPS spectra of (a)  $\text{CoIn}_2\text{S}_4$ ; High-resolution XPS spectra of (b) Co 2p, (c) In 3d, and (d) S 2p.

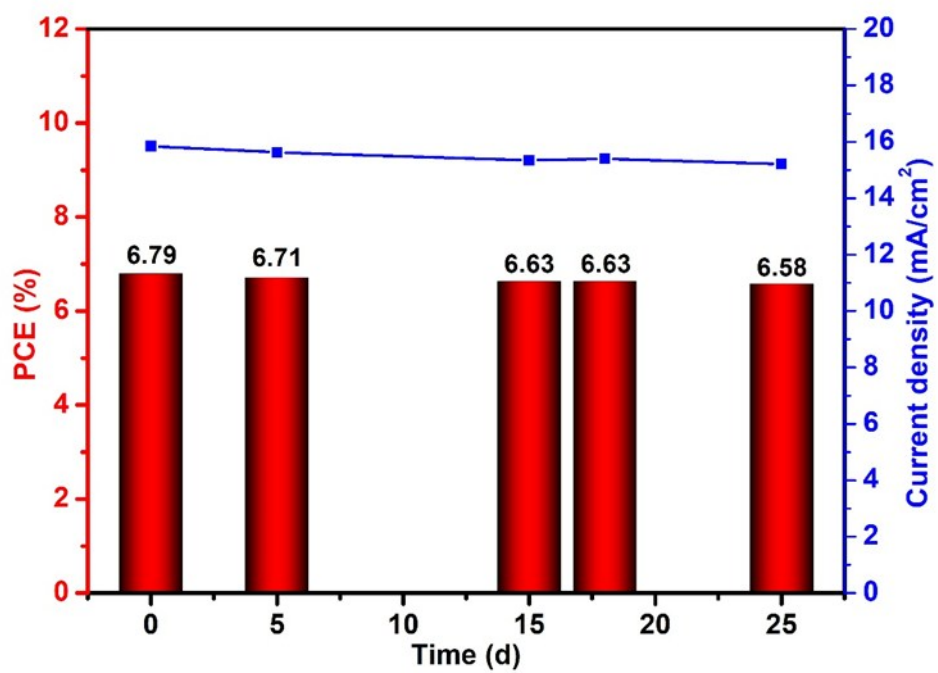

**Figure S5.** Long-term stability of DSSCs based on CoW<sub>12-0.3</sub>/CoIn<sub>2</sub>S<sub>4</sub> heterostructures.

**Table S1.** The composition of elements for CoW<sub>12</sub>/CoIn<sub>2</sub>S<sub>4</sub> heterostructures obtained from EDS spectra.

| Element | Weight/ % | Atom/ % | NET strength |
|---------|-----------|---------|--------------|
| O       | 14.07     | 47.46   | 28.35        |
| S       | 12.81     | 21.56   | 106.45       |
| In      | 13.59     | 6.38    | 62.18        |
| Co      | 11.45     | 10.49   | 54.73        |
| W       | 48.08     | 14.11   | 64.31        |

**Table S2.** EIS parameters using the different materials as CE.

| Sample                                                  | R <sub>s</sub> (Ω/cm <sup>2</sup> ) | R <sub>ct</sub> (Ω/cm <sup>2</sup> ) | Z <sub>w</sub> (Ω/cm <sup>2</sup> ) |
|---------------------------------------------------------|-------------------------------------|--------------------------------------|-------------------------------------|
| Pt                                                      | 40.96                               | 20.36                                | 0.028                               |
| CoIn <sub>2</sub> S <sub>4</sub>                        | 40.58                               | 17.35                                | 0.013                               |
| CoW <sub>12</sub> -0.1/CoIn <sub>2</sub> S <sub>4</sub> | 47.20                               | 11.52                                | 0.032                               |
| CoW <sub>12</sub> -0.3/CoIn <sub>2</sub> S <sub>4</sub> | 36.81                               | 5.93                                 | 0.057                               |
| CoW <sub>12</sub> -0.6/CoIn <sub>2</sub> S <sub>4</sub> | 42.51                               | 22.25                                | 0.006                               |
